# Supplementary material
Source: publisher site journal article supplement (https://www.spandidos-publications.com/1112/downloadSupplementary)

Figure S1. Sites C and D are unresponsive to p53 regulation. MCF7 cells were treated with 0.5  $\mu$ M doxorubicin. The chromatin immunoprecipitates were obtained using p53 antibody, mouse normal IgG or without antibody, and subjected to PCR analysis. Chromatin inputs from doxorubicin-treated or non-treated MCF7 cells were also used as positive controls for PCR, while double-distilled H<sub>2</sub>O was used as a PCR template for negative control. The PCR products were resolved on a 2% agarose gel. Data are presented as the mean  $\pm$  standard deviation of triplicate transfections, and are representative of 3 independent experiments. PCR, polymerase chain reaction; Dox, doxorubicin.

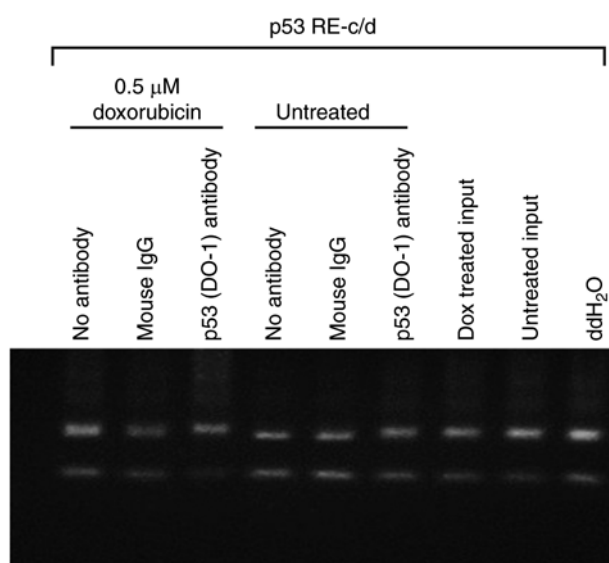

Figure S2. Mutations of sites A and B can rescue the inhibition of anillin promoter luciferase activity induced by Dox treatment.  $\beta$ -galactosidase expression plasmids were co-transfected with pGL3 vector or reporter plasmids A or B (A), or with pcDNA3, wild-type p53, R175H or R248W (B) into both HCT116/p53<sup>+/+</sup> and HCT116/p53<sup>-/-</sup> cells for 24 h. Cells were then treated with 0.5  $\mu$ M doxorubicin for an additional 24 h. Luciferase reporter activity was measured and normalized to  $\beta$ -galactosidase activity in the same sample, and presented as fold reduction. Data are presented as the mean  $\pm$  standard deviation of triplicate transfections, and are representative of 3 independent experiments. wt, wild-type.

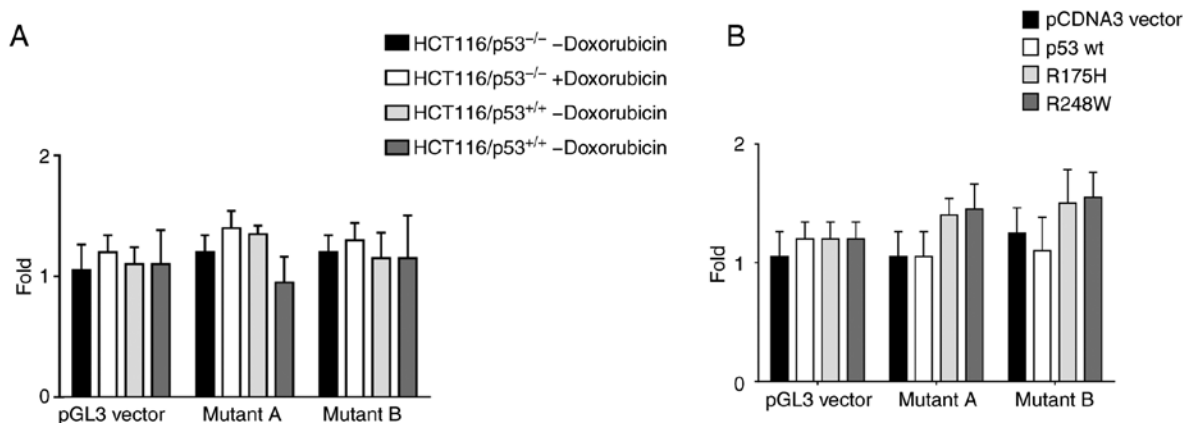

Figure S3. Transfection efficiency validation via western blotting.  $\beta$ -galactosidase expression plasmids were co-transfected with either pcDNA3, wt p53, R175H or R248W into HCT116/p53<sup>-/-</sup> cells for 48 h. Whole cell lysates were collected and p53 protein expression levels were determined by p53 DO-1 antibody using an immunoblotting assay.  $\beta$ -actin was used as a loading control. The experiment was repeated 3 times. wt, wild-type.

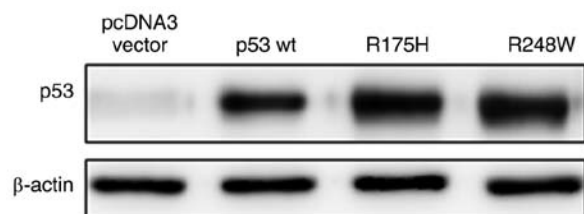

Supplement: Supplementary file 1 [file downloadSupplementary]
